# Supplementary material for: Artificial local magnetic field inhomogeneity enhances T2 relaxivity
Source: PubMed Central journal article supplement (PMC5454366; doi:10.1038/ncomms15468), 2017-05-18
Supplement: ncomms15468-s1.pdf [file ncomms15468-s1.pdf]

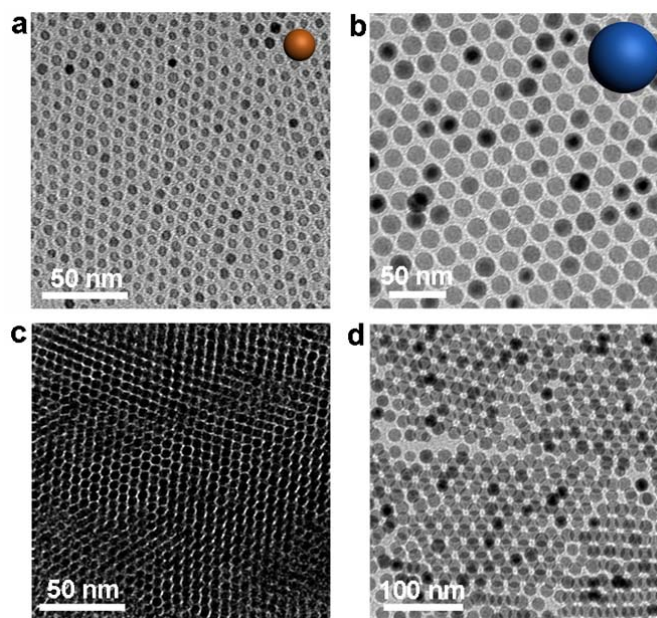

1

2 **Supplementary Fig. 1 | TEM images of the single IO NPs.** The single layer (a,b) and multi-layer  
3 (c,d) self-assembling onto copper grid indicates the uniform diameters of IO NPs. The averaged  
4 diameters are 5.2 and 15.1 nm with standard deviations of 4.4% and 2.9% for IO-5 and IO-15 NPs,  
5 respectively.

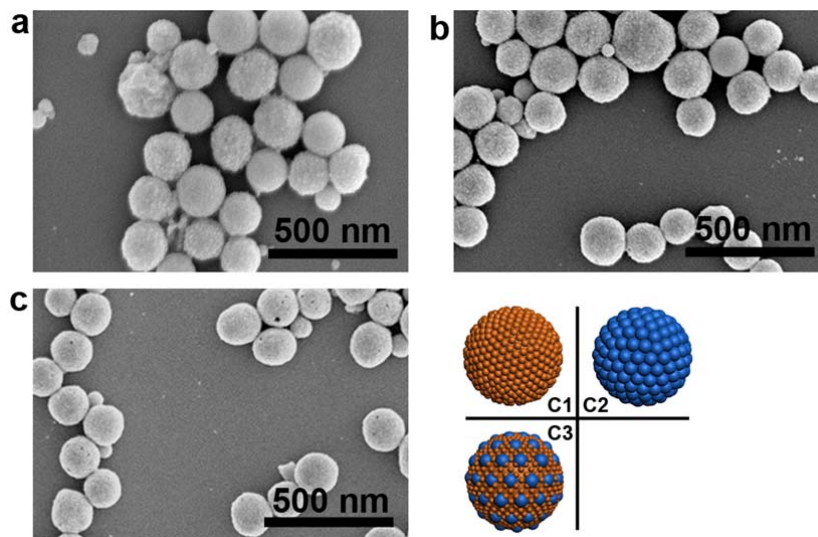

6

7 **Supplementary Fig. 2 | SEM images of the IO clusters C1-C3.** (a-c) SEM images of IO clusters  
8 C1-C3, respectively. The samples were coated with a layer of gold of a thickness of 3 nm before  
9 testing.

10

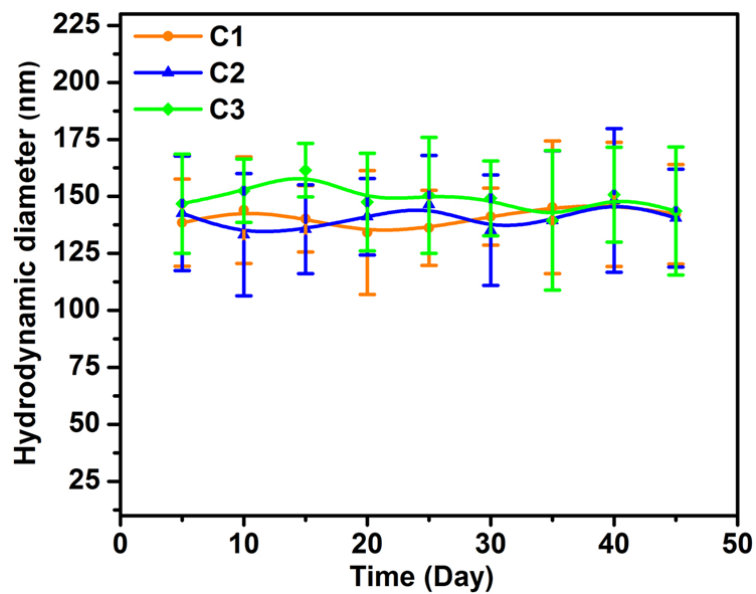

11

12 **Supplementary Fig. 3 | DLS measurements of the IO clusters C1-C3.** Hydrodynamic diameters  
 13 of IO clusters C1-C3 in aqueous solution through a period of 45 days after preparation, indicating  
 14 good colloidal stability. Errors are mean values  $\pm$  s.d.;  $n = 3$ .

15

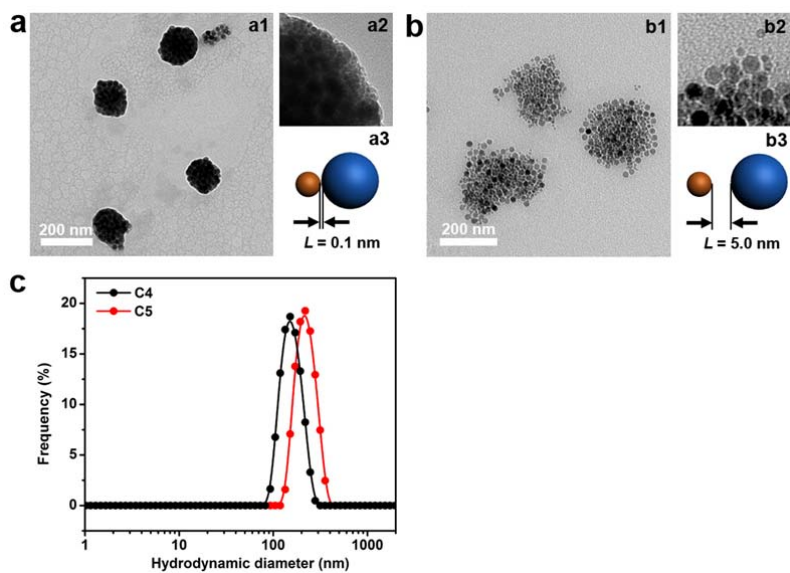

16

17 **Supplementary Fig. 4 | TEM images and DLS analysis of the IO clusters C4 and C5.** (a) C4 and

18 (b) C5 composed of IO-5 and IO-15 NPs. (a1, b1) TEM and (a2, b2) HRTEM images and (a3, b3)

19 cartoons show the different inter-particle distances ( $L$ ) of about 0.1 and 5.0 nm for C4 and C5

20 respectively. (c) DLS measurement of IO clusters C4 and C5 dispersed in water.

21

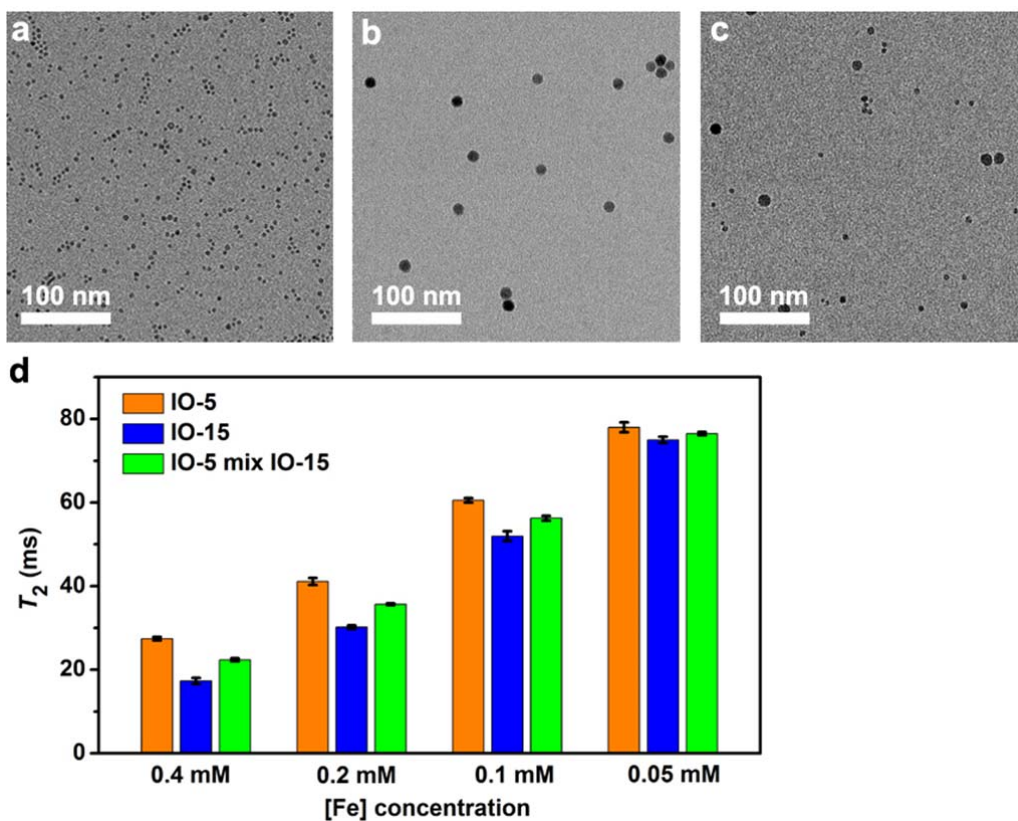

22

23 **Supplementary Fig. 5 | TEM images and  $T_2$  relaxation times of the single IO NPs.** The single IO

24 NPs coated with meso-dimercaptosuccinic acid (DMSA) molecules and dispersed in water: (a) IO-5,

25 (b) IO-15, and (c) IO-5 plus IO-15 NPs mixed in a ratio of 1:1 with respect to iron mass. (d) The  $T_2$

26 relaxation times of the IO-5, IO-15, and IO-5 mix IO-15 samples at different concentrations,

27 indicating an averaged relaxation enhancement effect for the sample with mixed component

28 compared with samples with individual component. Errors are mean values  $\pm$  s.d.;  $n = 3$ .

29

30

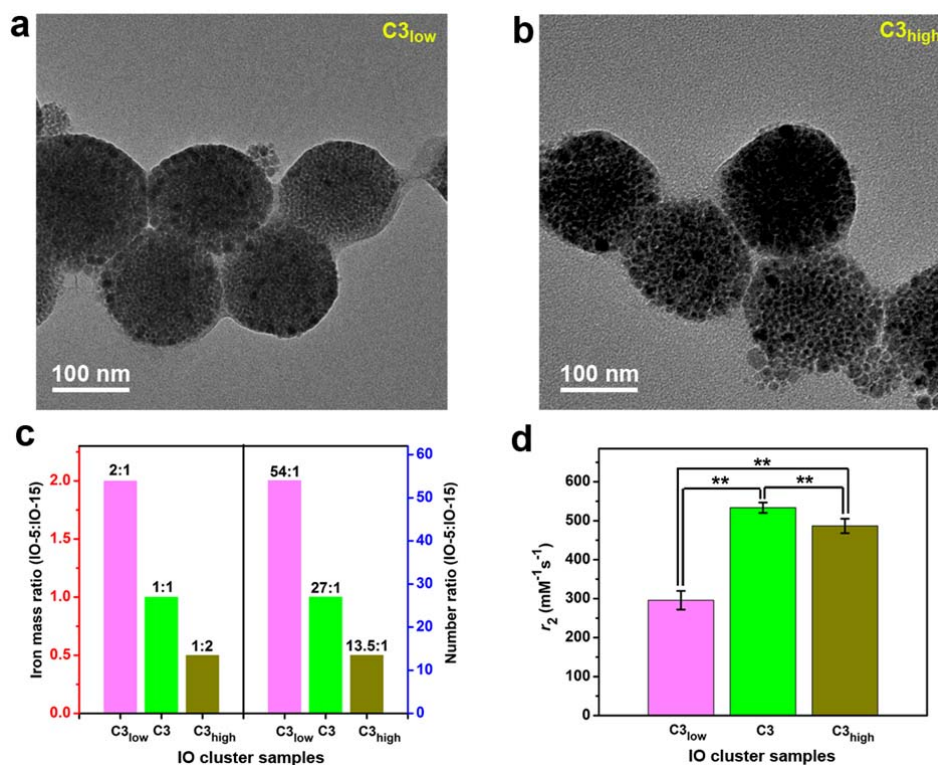

31

32 **Supplementary Fig. 6 | TEM images and relaxivities of IO clusters C3<sub>low</sub> and C3<sub>high</sub> samples.** (a,

33 b) TEM images of IO cluster C3<sub>low</sub> and C3<sub>high</sub> samples, respectively. (c) The iron mass ratios are 2:1,

34 1:1, and 1:2 with respect to IO-5 to IO-15 NPs in IO cluster C3<sub>low</sub>, C3, and C3<sub>high</sub> samples, while the

35 number ratios are 54:1, 27:1, and 13.5:1, respectively. (d) Comparison of  $r_2$  values for IO cluster

36 C3<sub>low</sub>, C3, and C3<sub>high</sub> samples ( $n = 3$ ; \*\* $p < 0.01$ ).

37

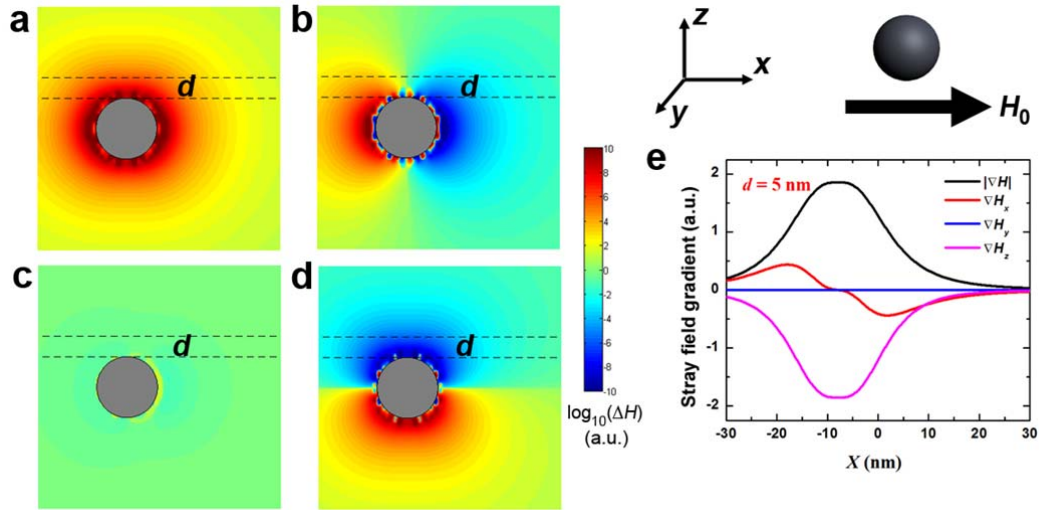

38

39 **Supplementary Fig. 7 | Pilot modeling of a single IO NP.** A IO NP was placed under an external

40 magnetic field along the  $+x$  direction. (a) Integrated stray field gradient ( $|\Delta H|$ ) for all directions. (b-d)

41 Stray field gradient along  $x$ ,  $y$ , and  $z$  directions, respectively.  $\Delta H_x = \frac{\partial H}{\partial x}$ ,  $\Delta H_y = \frac{\partial H}{\partial y}$ ,  $\Delta H_z = \frac{\partial H}{\partial z}$ .

42 Color bars represent  $\log_{10}(\Delta H)$  (a.u.), where  $H$  is the calculated stray field at  $x$ ,  $y$ , or  $z$  direction. (e)

43 Calculated stray field gradient for the figures a-d. The results indicated that the stray field gradient at

44 the plane perpendicular to  $z$  direction ( $d = 5$ ) mainly comes from components in the  $x$  and  $z$

45 directions. The positive or negative trends for  $\Delta H_x$ ,  $\Delta H_y$ , and  $\Delta H_z$  indicate the increase or decrease

46 of stray field gradient at these directions, respectively.

47



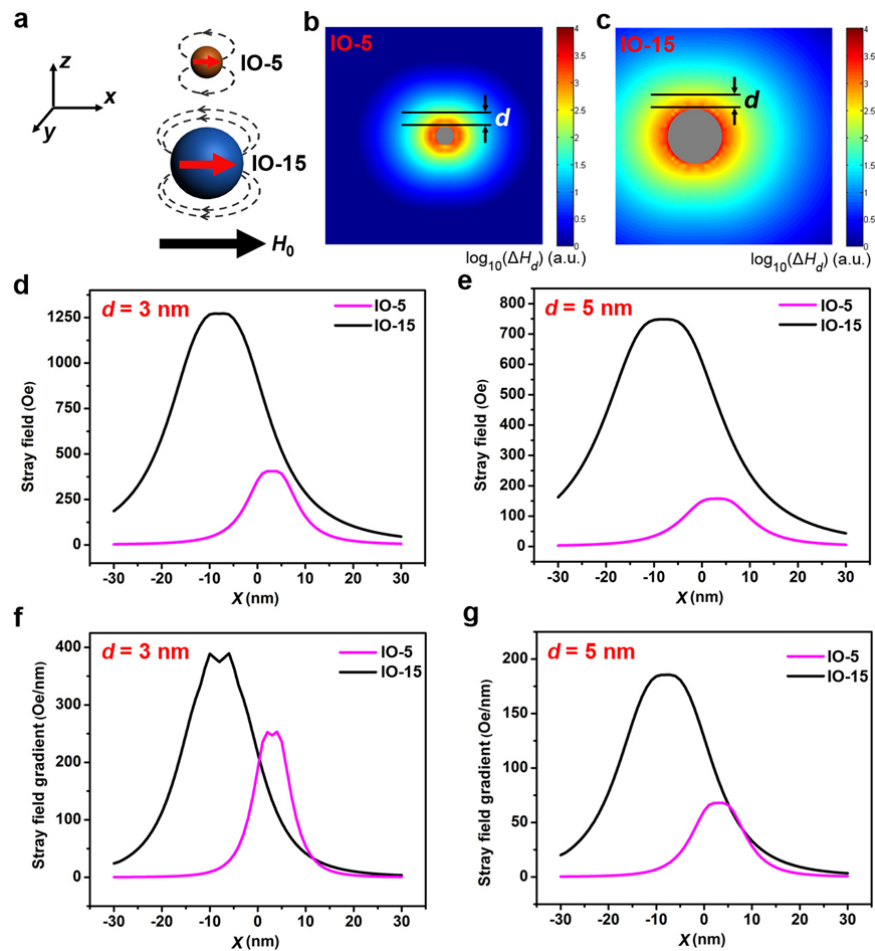

48

49 **Supplementary Fig. 8 | Simulation results of single IO-5 and IO-15 NPs.** (a) Cartoon shows the  
 50 models for calculating the stray field and field gradient of single IO NPs (IO-5 and IO-15). An  
 51 external magnetic field (7 T) is applied along the +x direction. (b,c) Simulated results of stray field  
 52 gradient for IO-5 and IO-15 NPs. Color bars represent  $\log_{10}(\Delta H_d)$  (a.u.), where  $H_d$  is the calculated  
 53 stray field. The stray field (d,e) and field gradient (f,g) of IO-5 and IO-15 NPs calculated on the  $xy$   
 54 plane with different distances of  $d$  (3 and 5 nm) from the top of IO NPs.

55



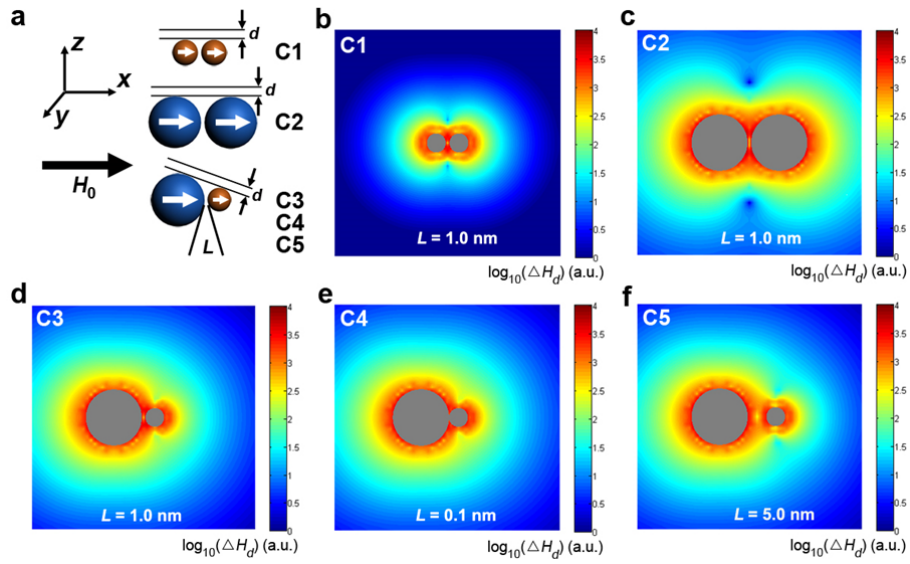

56

57 **Supplementary Fig. 9 | Additional simulation results of C1-C5.** The stray field gradient for  
 58 models C1-C5. (a) Cartoon models show an external magnetic field (7 T) is applied along the +x  
 59 direction for simulation and calculation. (b-f) Simulated stray field gradient for models C1-C5. Color  
 60 bars represent  $\log_{10}(\Delta H_d)$  (a.u.), where  $H_d$  is the calculated stray field.

61

62

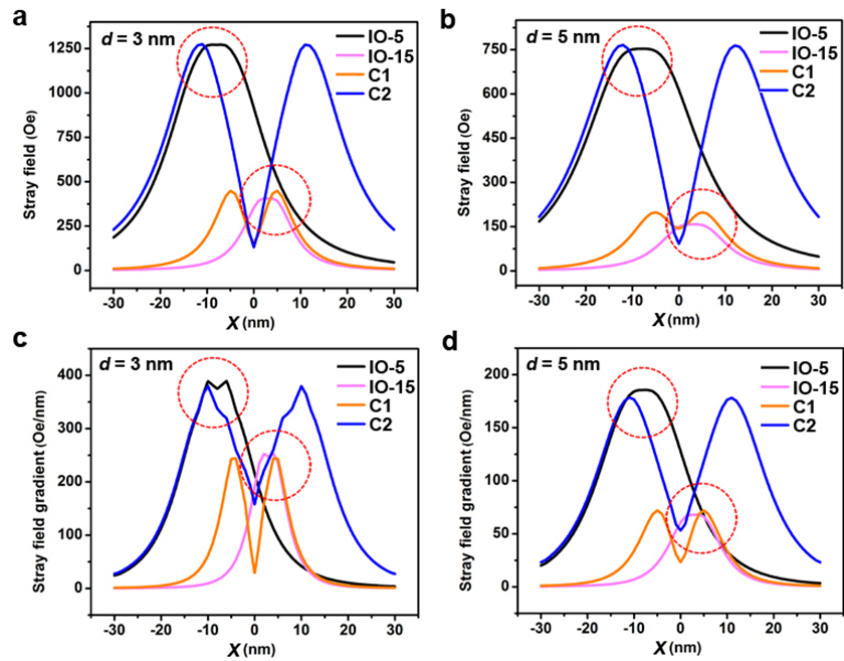

63

64 **Supplementary Fig. 10 | Comparison of IO-5, IO-15, C1, and C2 models.** Comparison of (a, b)

65 stray field and (c, d) stray field gradient generated by IO-5, IO-15, C1, and C2 models at distances ( $d$ )

66 of 3 and 5 nm. The results indicate that the inter-particle magnetic field coupling does not lead to

67 higher magnetic field as compared to those of IO-5 to C1 or IO-15 to C2 (highlighted by red dotted

68 circles).

69

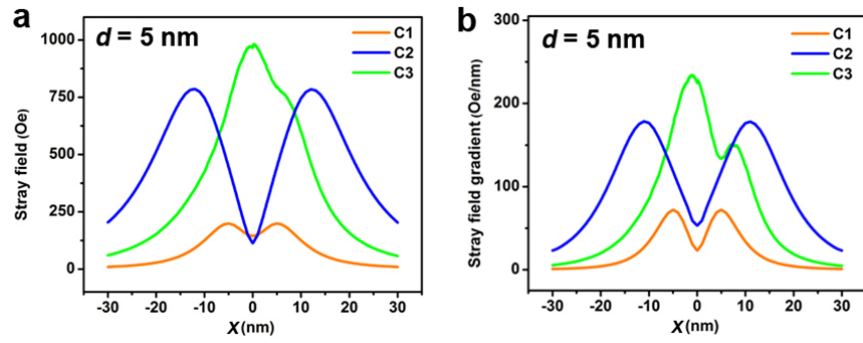

70

71 **Supplementary Fig. 11 | Additional simulation results of C1-C3.** The simulation results of stray  
 72 field and stray field gradient of C1-C3 at a distance ( $d$ ) of 5 nm when an external magnetic field  
 73 along the  $+x$  direction is applied.

74

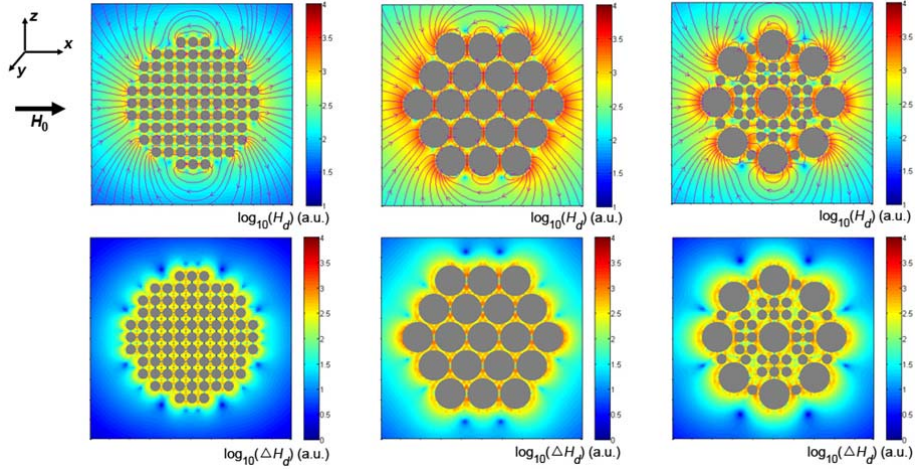

75

76 **Supplementary Fig. 12 | LLG simulation results of the multiple-particle models.** The external  
 77 magnetic field is along +x direction. The stray field (upper row) and stray field gradient (lower row)  
 78 of the IO cluster models C1, C2, and C3 show obvious differences in field inhomogeneity around the  
 79 IO cluster models, which are in good agreement with that derived from the two-particle models.  
 80 Color bars represent  $\log_{10}(H_d)$  (a.u.) for the upper row and  $\log_{10}(\Delta H_d)$  (a.u.) for the lower row, where  
 81  $H_d$  is the calculated stray field.

82

83

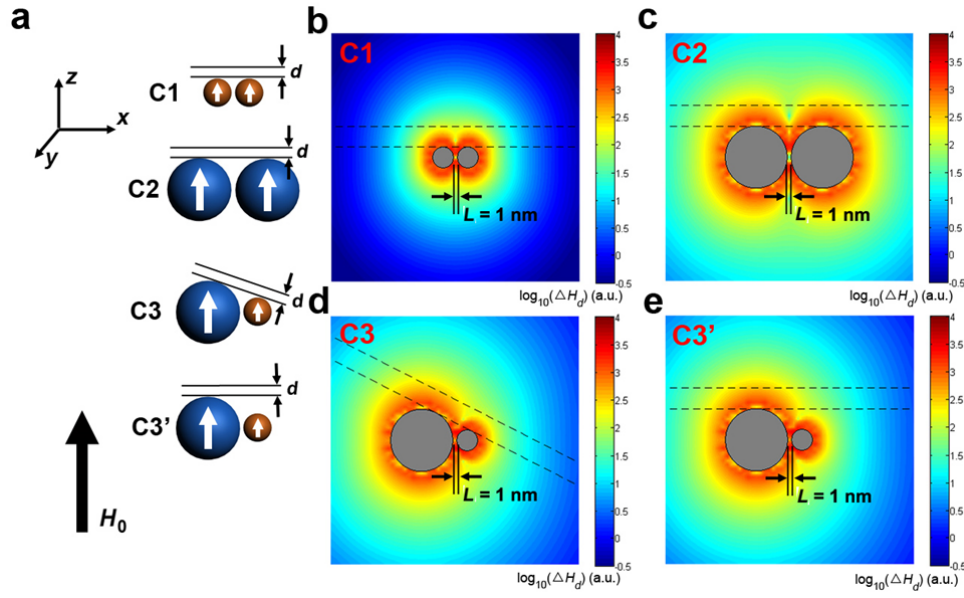

84

85 **Supplementary Fig. 13 | Additional simulation results for C1, C2, C3, and C3'.** (a) Cartoon  
 86 models and (b-e) simulated stray field gradient for IO clusters (C1, C2, C3 and C3') with an external  
 87 magnetic field (7 T) applied along the +z direction. The inter-particle distance ( $L$ ) is 1 nm for all the  
 88 models. Color bars represent  $\log_{10}(\Delta H_d)$  (a.u.), where  $H_d$  is the calculated stray field.

89

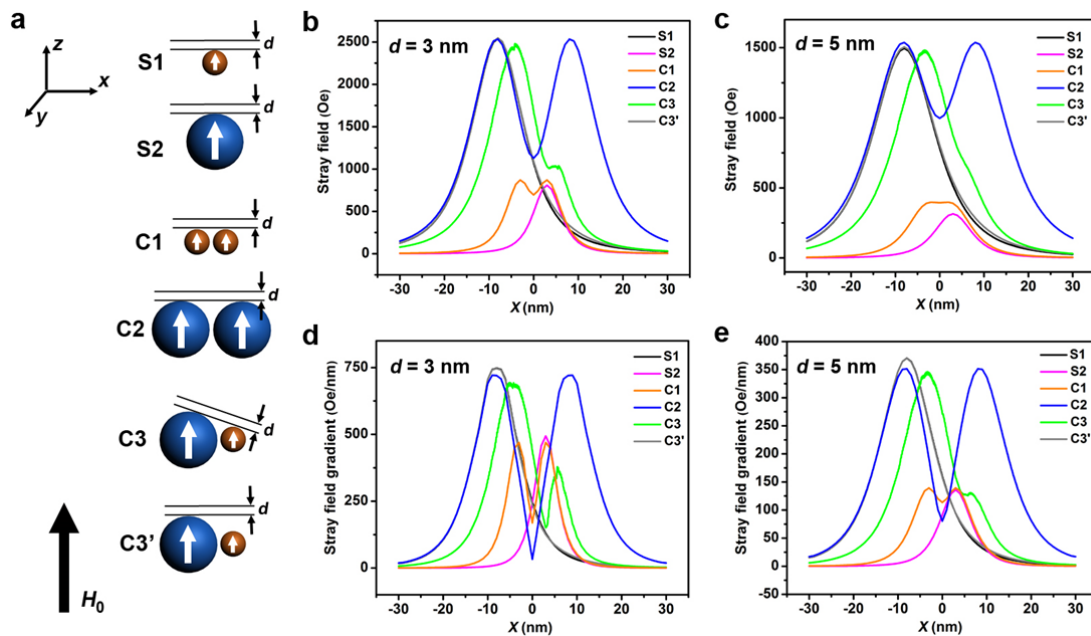

90

91 **Supplementary Fig. 14 | Additional simulation results for S1, S2, C1, C2, C3, and C3'.** (a)

92 Cartoon shows the models for calculating the stray field and field gradient of single IO NPs (IO-5

93 and IO-15) and IO clusters (C1, C2, C3 and C3'). An external magnetic field (7 T) is applied along

94 the +z direction. (b, c) Calculated results of stray field of these models at out plane distance  $d = 3$  and

95 5 nm, respectively. (d, e) Calculated results of stray field gradient of these models at  $d = 3$  and 5 nm,

96 respectively.

97

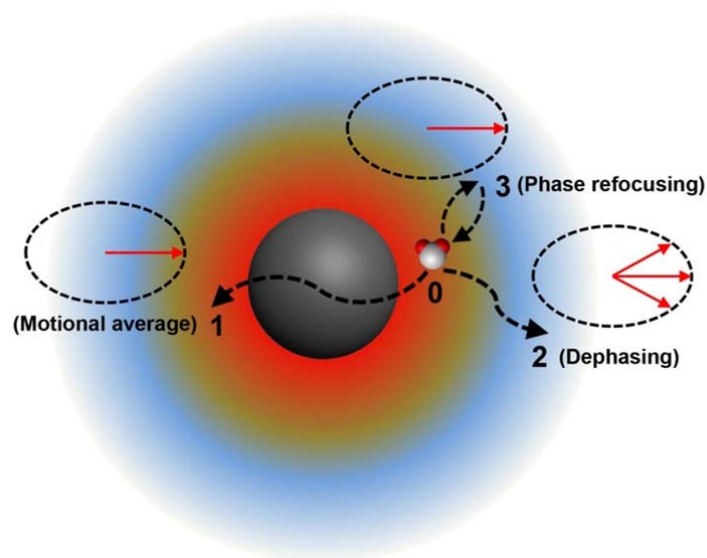

98

99 **Supplementary Fig. 15 | Schematic model showing water molecule diffusion around a magnetic**

100 **nanoparticle.** Assuming that water molecules at position 0 are at phase focusing state, the diffusion

101 to position 1 would average out the loss of phase coherence and refocus the phase coherence

102 (motional averaging regime). On the other hand, the diffusion to position 2 undergoing an

103 inhomogeneous magnetic field causes the loss of phase coherence (dephasing). The diffusion through

104 an inverse magnetic field is considered to reverse the dephasing event (route 3). This scheme

105 indicates that protons diffusion through the field gradient is the major contributing factor to

106 dephasing and shortening of  $T_2$  relaxation time.

107



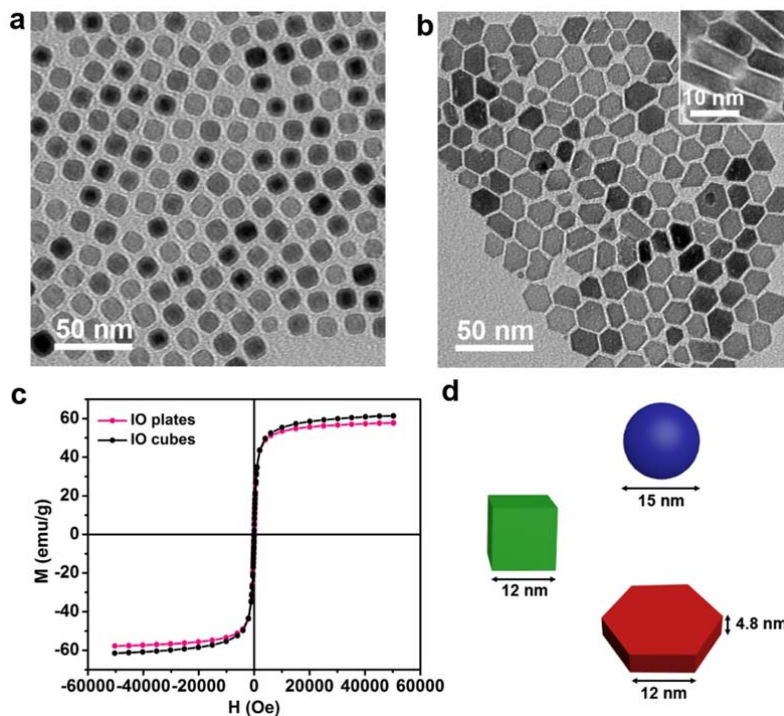

108

109 **Supplementary Fig. 16 | Characterizations of IO cubes and plates.** (a,b) TEM images and (c)

110 magnetic hysteresis curves of IO cubes with side length of 12 nm and IO plates with side length of

111 12 nm and thickness of 4.8 nm. Inset (b) shows TEM image of vertical nanoplates. (d) Cartoon

112 models showing the physical parameters for IO cubes and plates and IO-15 spheres. These single

113 structures were calculated with equivalent solid volume.

114

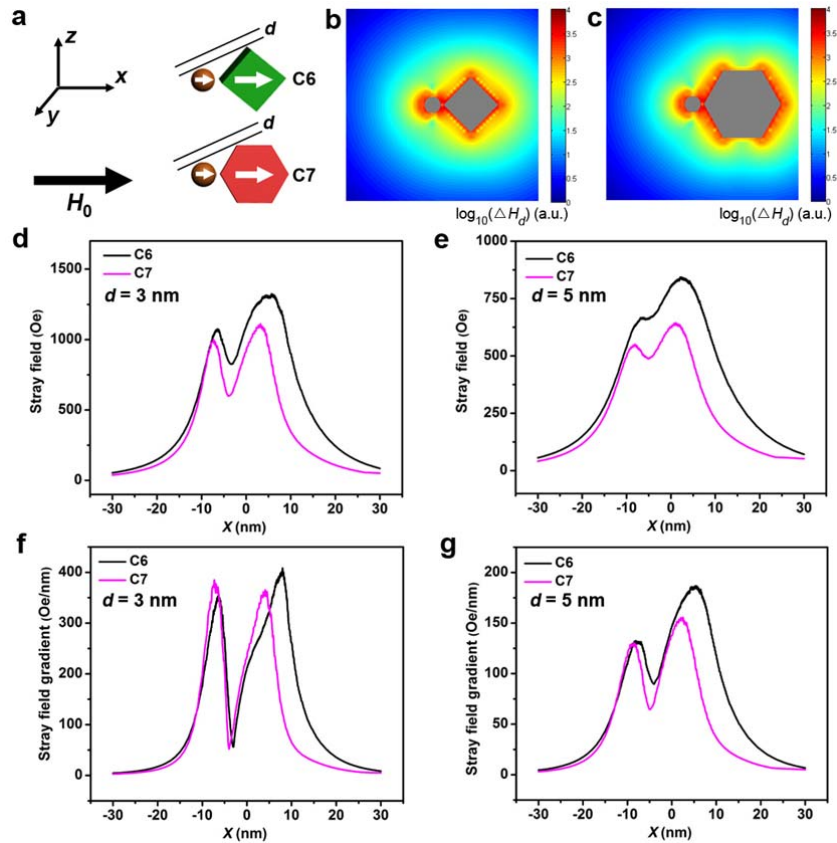

115

116 **Supplementary Fig. 17 | Simulation results of C6 and C7.** (a) Cartoon shows the models C6 and

117 C7 for calculating the stray field and field gradient. An external magnetic field (7 T) is applied along

118 +x direction. (b, c) Simulated stray field gradient for C6 and C7. Color bars represent  $\log_{10}(\Delta H_d)$

119 (a.u.), where  $H_d$  is the calculated stray field. (d, e) Calculated stray field of models C6 and C7 at  $d =$

120 3 and 5 nm, respectively. (f, g) Calculated stray field gradient of models C6 and C7 at  $d = 3$  and 5 nm,

121 respectively.

122

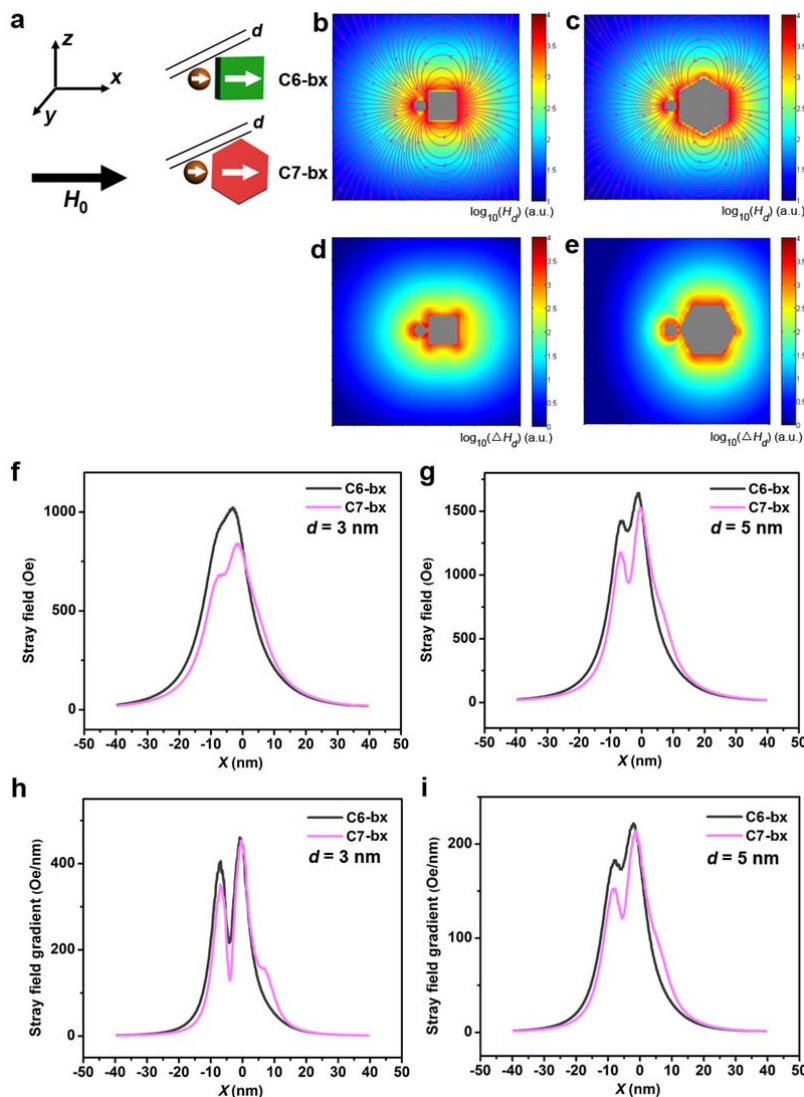

123

124 **Supplementary Fig. 18 | Additional simulation results of C6 and C7 with different orientations.**

125 (a) Cartoon shows the models C6-bx and C7-bx for calculating the stray field and field gradient with

126 an external magnetic field (7 T) applied along  $+x$  direction. (b-e) Simulated stray field (b,c) and stray

127 field gradient (d,e) for C6-bx and C7-bx, respectively. Color bars represent  $\log_{10}(H_d)$  (a.u.) or

128  $\log_{10}(\Delta H_d)$  (a.u.), where  $H_d$  is the calculated stray field. (f, g) Calculated stray field of models C6-bx

129 and C7-bx at  $d = 3$  and 5 nm, respectively. (h, i) Calculated stray field gradient of models C6-bx and

130 C7-bx at  $d = 3$  and 5 nm, respectively.

131

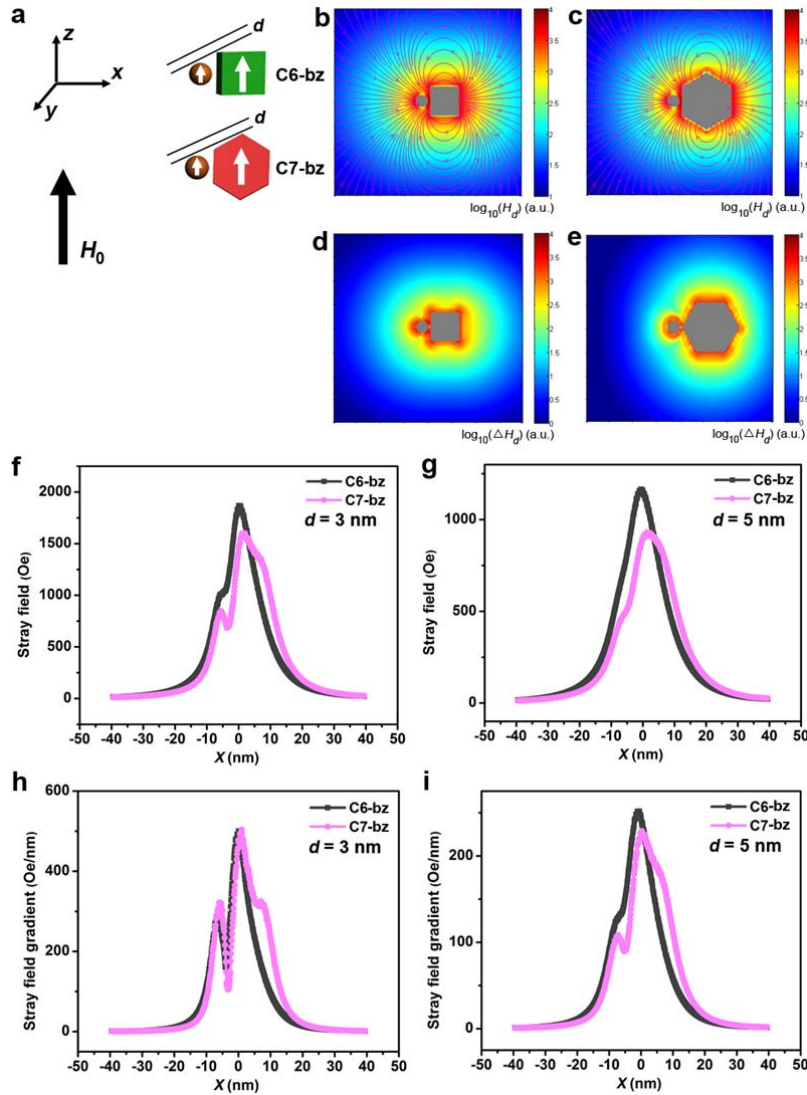

132

133 **Supplementary Fig. 19 | Additional simulation results of C6 and C7 with different orientations.**

134 (a) Cartoon shows the models C6-bz and C7-bz for calculating the stray field and field gradient with

135 an external magnetic field (7 T) applied along +z direction. (b,c) Simulated stray field (b,c) and stray

136 field gradient (d,e) for C6-bz and C7-bz, respectively. Color bars represent  $\log_{10}(H_d)$  (a.u.) or

137  $\log_{10}(\Delta H_d)$  (a.u.), where  $H_d$  is the calculated stray field. (f, g) Calculated stray field of models C6-bz

138 and C7-bz at  $d = 3$  and 5 nm, respectively. (h, i) Calculated stray field gradient of models C6-bz and

139 C7-bz at  $d = 3$  and 5 nm, respectively.

140

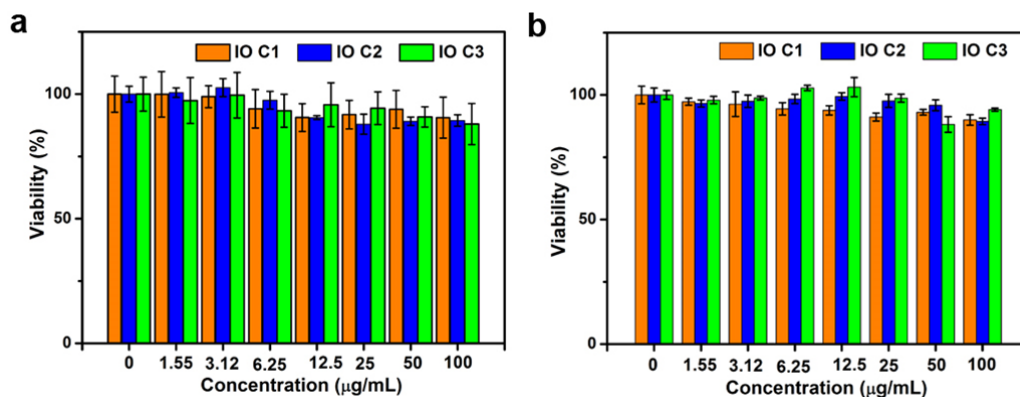

141

142 **Supplementary Fig. 20 | Cell viability assay of IO clusters C1-C3.** Cell viability results of IO  
 143 clusters C1-C3 on (a) HepG2 and (b) Raw 264.7 cell lines, showing that 90% of both HepG2 and  
 144 Raw 264.7 cells were viable at concentrations up to 100 µg Fe mL<sup>-1</sup> after 24 h incubation. The assays  
 145 were based on cell counting kit-8 (CCK-8) method. Errors are mean values ± s.d.; *n* = 3.

146

147

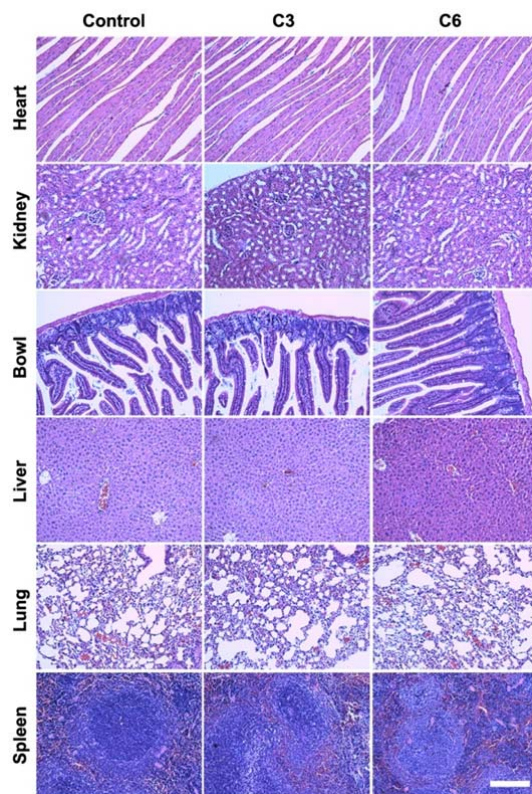

148

149 **Supplementary Fig. 21 | Representative organ histological analysis of mice.** Mice were treated  
 150 with PBS (control), IO cluster C3 or C6 with a dose of 2.0 mg Fe kg<sup>-1</sup> mouse body weight through  
 151 tail vein injection. Organs dissected from mice at 24 h post-injection (p.i.) time. The organs were  
 152 stained with heamatoxylin and eosin (H&E). No abnormal behavior of mice was found during the  
 153 treatment time. The major organs of heart, kidney, liver, bowel, lung, and spleen did not exhibit  
 154 significant microscopic lesions, indcating little acute toxicity of IO clusters C3 and C6 in the living  
 155 mice model. Scale bar: 100 μm for all images.

156

157

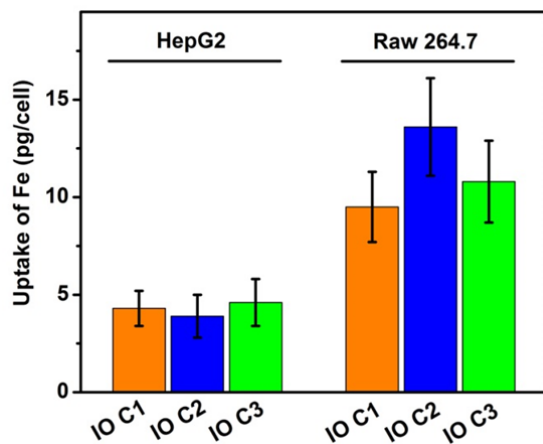

158

159 **Supplementary Fig. 22 | Cellular uptake analysis of IO clusters at different cell lines.** Cellular

160 uptake of IO clusters C1-C3 by HepG2 and macrophage Raw 264.7 cells ( $\sim 10^6$ ) after 4 h incubation

161 at a concentration of  $50 \mu\text{g mL}^{-1}$  with respect to iron mass. Each point was obtained as the mean of

162 triplicate measurements  $\pm$  s.d. The concentrations were determined by inductively coupled plasma

163 atomic emission spectroscopy (ICP-AES). Errors are mean values  $\pm$  s.d.;  $n = 3$ .

164

165



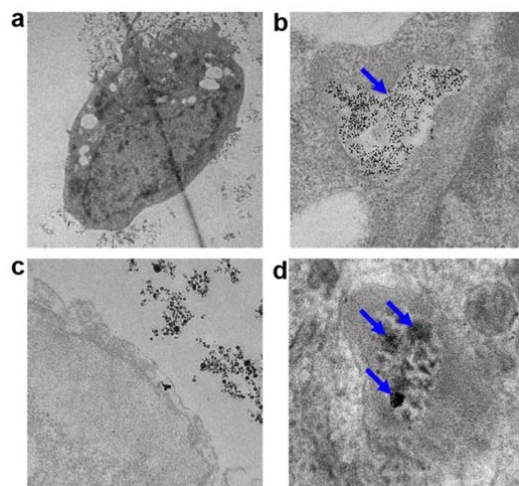

166

167 **Supplementary Fig. 23 | Sectional cell TEM images.** TEM images of RAW 264.7 cells after being  
168 incubated with (a,b) single IO-15 NPs or (c,d) IO cluster C2. Blue arrows indicate IO NPs in  
169 endocytotic vesicles.

170

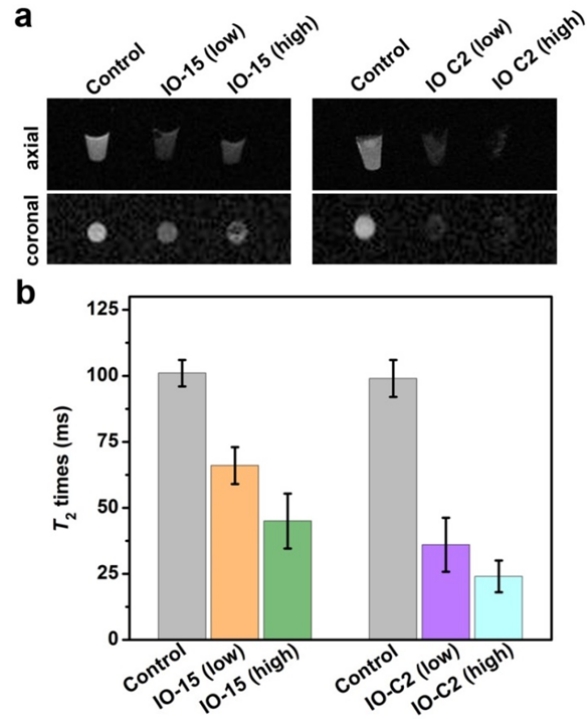

171

172 **Supplementary Fig. 24 | *In vitro* cell MRI study conducted on a 7 T MRI scanner.** (a) MR

173 phantom and (b)  $T_2$  relaxation times of Raw 264.7 cells after being incubated with different

174 concentrations of single IO-15 (left) and IO C2 (right) samples for 4 h. The control, low, and high

175 indicate the final concentrations of 0, 2, and 5  $\mu\text{g mL}^{-1}$  with respect to iron mass, respectively. Each

176 well contains  $\sim 5 \cdot 10^6$  cells mixed with 1% of agarose gel. Errors are mean values  $\pm$  s.d.;  $n = 3$ .

177

178

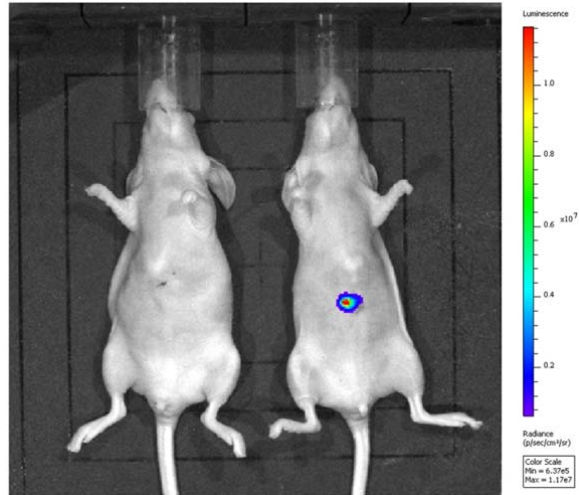

179

180 **Supplementary Fig. 25 | Bioluminescence imaging of tumor bearing mice.** The orthotopic liver  
181 tumor models were established by HepG2 cells with genetically encoded firefly luciferase. The  
182 image was acquired after intravenous injection of a substrate luciferin to allow bioluminescence  
183 recovery by luciferase specifically at the tumor region (right). No bioluminescence was observed in a  
184 control mouse without HepG2 tumor (left).

185

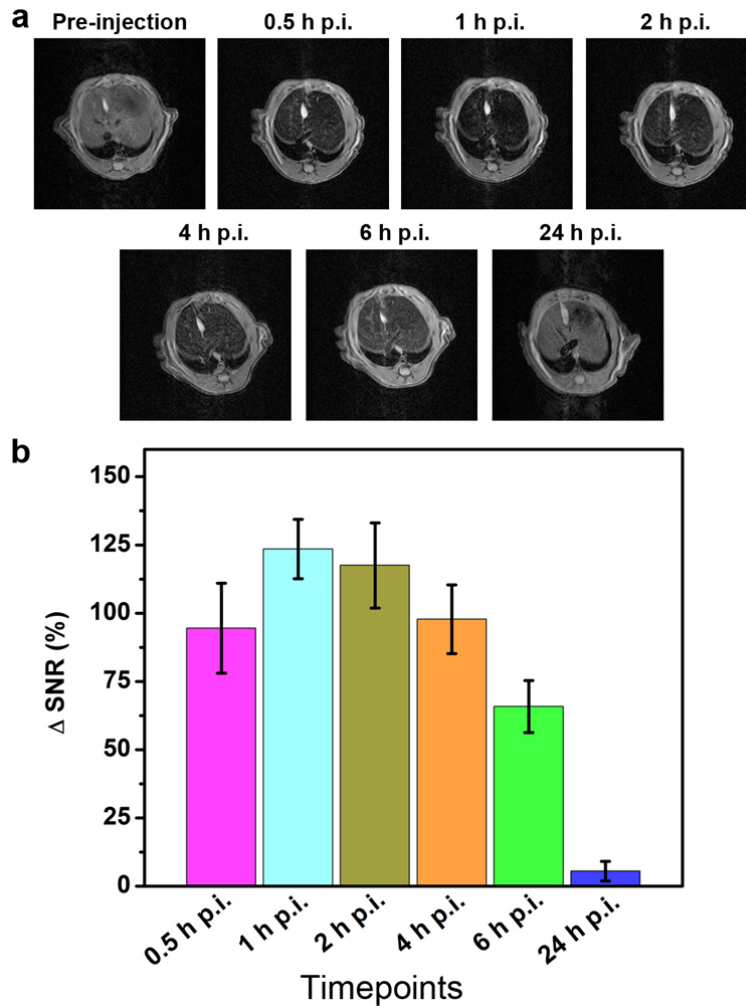

186

187 **Supplementary Fig. 26 | *In vivo* MRI of mouse liver.** (a) MR images of mouse liver before and  
 188 after intravenous injection of IO C3 with a dose of  $1.0 \text{ mg kg}^{-1}$  with respect to iron mass to mouse  
 189 body weight. The axial MR images of liver at time-points of 0.5, 1, 2, 4, 6, and 24 h post-injection  
 190 (p.i.) were acquired to compare with the image of pre-injection. (b) Quantitative analysis of the  
 191 changes of signal-to-noise ( $\Delta$ SNR) at different p.i. time-points, showing that the maximum  $\Delta$ SNR  
 192 was attained at around 1 h p.i. in liver. Errors are mean values  $\pm$  s.d.;  $n = 3$ .

193

194

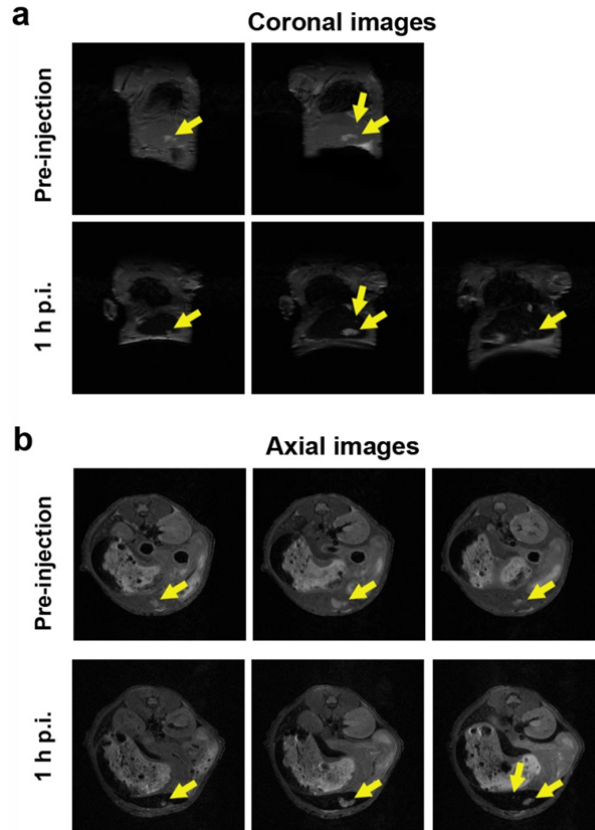

195

196 **Supplementary Fig. 27 | Additional *in vivo*  $T_2$  MR images of liver tumor model.** MR images of  
 197 mouse liver bearing an orthotopic liver tumor (HepG2) using IO cluster C3 as contrast agents on a 7  
 198 T MRI scanner. The IO cluster C3 was injected through intravenous route with a dose to iron  
 199 concentration of  $1.0 \text{ mg Fe kg}^{-1}$  mouse body weight. All of the MR images at (a) coronal and (b)  
 200 axial planes with slices containing tumor (or small lesion) are presented. Yellow arrows indicate liver  
 201 tumor (or small lesion).

202

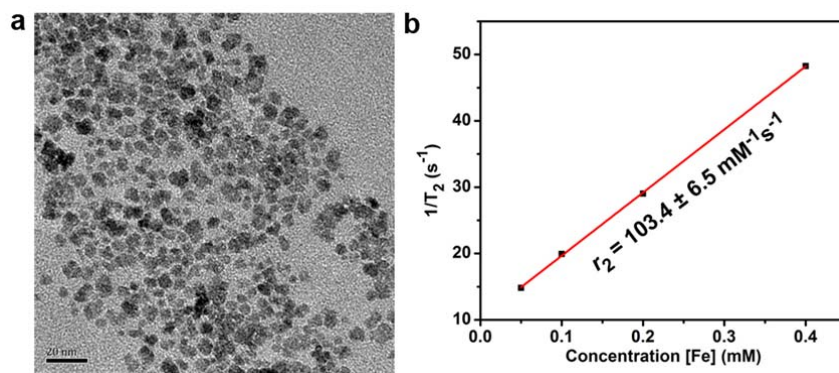

203

204 **Supplementary Fig. 28 | Characterizations of ferumoxytol (Feraheme).** (a) TEM images and (b)

205  $T_2$  relaxivity measured on a 7 T MRI scanner, showing the  $r_2$  value of  $103.4 \pm 6.5 \text{ mM}^{-1} \text{ s}^{-1}$  with

206 respect to concentration of iron ions. Errors are mean values  $\pm$  s.d.;  $n = 3$ .

207

208

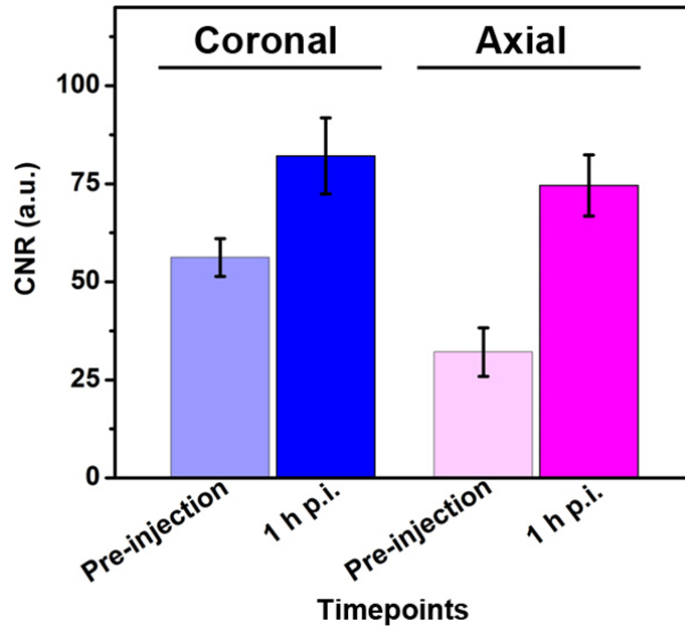

209

210 **Supplementary Fig. 29 | Quantitative analysis of contrast-to-noise ratios of tumor.** The analysis  
 211 was based on pre-injection and 1 h post-injection (p.i.) images of mouse liver bearing an orthotopic  
 212 liver tumor (HepG2) as described in the Figure 5. Ferumoxytol was injected through intravenous  
 213 route at a dose of 1.0 mg Fe kg<sup>-1</sup> to mouse body weight and contrast-enhanced MRI study was  
 214 conducted on a 7 T scanner. Errors are mean values ± s.d.; *n* = 3.

215

216



## 217 **Supplementary Methods**

218 **Synthesis of iron oxide nanoparticles.** Iron oxide nanoparticles (IO NPs) with diameter of 5 nm  
219 were obtained following procedures reported elsewhere (Supplementary Refs. 1 and 2). IO NPs with  
220 diameter of 15 nm were modified from a previously developed method. To obtain IO-5 NPs, 353 mg  
221 of Fe(acac)<sub>3</sub>, 1 mL of oleic acid, 1 mL of oleyl amine, 1.25 g of 1,2-hexadecanediol, and 10 mL of  
222 benzyl ether were mixed in a flask, allowing for degassing with N<sub>2</sub> under 100 °C for 20 min. The  
223 system was then heated under reflux and maintained for 30 min before cooling to room temperature.  
224 The product was collected by centrifugation with the addition of ethyl alcohol and purified with a  
225 mixture of hexane and ethyl alcohol. The final product of IO-5 NPs was dispersed in hexane for  
226 further use. To obtain IO-15 NPs, 900 mg of iron oleate, 0.16 mL of oleic acid, and 15 mL of  
227 1-octadecene were mixed in a flask and degassed with N<sub>2</sub>. The system was heated under reflux and  
228 maintained for 1 h. After cooling to room temperature, excess of isopropanol was added to  
229 precipitate the product. The final product was obtained by centrifugation and dispersed in hexane for  
230 further use.

231 For the synthesis of IO nanoplates, 0.9 g (1 mmol) iron oleate complex was dissolved in 10 mL  
232 benzyl ether, with the addition of 0.16 mL (0.5 mmol) oleic acid and 15 mg (0.1 mmol) sodium  
233 oleate. The solution was kept at 120 °C for 20 min before reaching reflux temperature, and was  
234 allowed to react for 1 h before cooling to room temperature. The products were obtained by addition  
235 of 50 mL ethanol and were collected by centrifugation at 7000 rpm for 10 min. After washing with  
236 ethanol twice, the precipitation was dispersed in hexane. The synthesis of IO cubes was performed as  
237 follows: 900 mg (1 mmol) of iron oleate was dissolved in 15 mL of TOA in the presence of 159 µL  
238 (0.5 mmol) of oleic acid. After replacement with a nitrogen atmosphere, the flask was then heated to

239 320 °C with a heating rate of about 10-15 °C per min and maintained at 320 °C for 2 h. The heating  
240 source was then removed to allow the system to cool to room temperature. The products were  
241 obtained by a similar procedure as above and dispersed in hexane. The samples for magnetization  
242 measurements were subjected to solvent washing (3 times) and metal bath drying (100 °C) to obtain  
243 dry powder samples.

244 **Synthesis of Pphosphonated poly(ethylene glycol) and ATRP initiator.** The ATRP initiator BiBEP  
245 was synthesized according to the method reported by Matyjaszewski *et al.* (Supplementary Ref. 3).  
246 To a solution of dimethyl(2-hydroxyethyl) phosphonate (1 g, 6.5 mmol) in methylene chloride (10  
247 mL), 0.9 mL (7 mmol) of bromotrimethylsilane was sequentially added at 0 °C. After 1 h, the  
248 temperature was raised to ambient temperature for a further 12 h. The solvent and volatile residues  
249 were removed then by evaporation, and methanolysis of the silylated intermediate was realized by  
250 adding an excess of methanol (5 mL) and stirred at room temperature for another 12 h. The solvent  
251 was evaporated to provide a quantitative yield of a slightly yellowish oil (2-hydroxyethyl)  
252 phosphonate after washing with ether. To prepare phosphonated poly(ethylene glycol) (PEG-P),  
253 PEG-COOH (0.5 g, 0.1 mmol) and (2-hydroxyethyl) phosphonate (0.038 g, 0.3 mmol) were  
254 dissolved in DMSO (5 mL), and DCC (0.041 g, 0.2 mmol) was slowly added to it. After the solution  
255 was stirred for 30 min at room temperature in the dark, DMAP (0.003 g, 0.025 mmol) in 0.5 mL  
256 DMSO was added. The mixture was stirred overnight in the dark at room temperature, filtered to  
257 remove the insoluble byproduct, dicyclohexylurea, and was precipitated using diethyl ether. The  
258 PEG-P was collected by filtration, washed with a mixture of dry diethyl ether and acetone (4:1) and  
259 dried under vacuum.

260 **Calculation of the graft density of PMMA on the IO nanoparticles surface.** Given the density ( $\rho$ )

261 of the IO NPs ( $\text{Fe}_3\text{O}_4$ ) is  $5.18 \text{ g/cm}^3$ , the molar mass of the IO NP ( $M_{\text{IO NP}}$ ) can be calculated using  
 262 Equation 1, where  $r$  is the radius of the IO NP. Combining the molar mass of the IO NP, the  
 263 molecular weight of polymer brush ( $M_{\text{polymer}}$ ) and the weight fraction obtained in TGA analysis, the  
 264 average number of polymer grafts can be calculated by Equation 2, where  $W_{\text{polymer}}$  is the weight  
 265 fraction of the organic part and  $W_{\text{IO NP}}$  is the weight fraction of IO NP. For the IO@PMMA  
 266 nanoparticle, the molecular weight of  $M_{\text{PMMA}}$  is 25.5 kDa and the organic weight fraction is 60%.  
 267 The result gives a number of 212 PMMA chains per NP with graft density of  $0.40 \text{ chain/nm}^2$ .

$$M_{\text{IO NP}} = (\rho V_{\text{IO NP}}) = \left( \rho \frac{4}{3} \pi r^3 \right) \quad (1)$$

$$N_{\text{grafts per IO NP}} = \left( \frac{W_{\text{polymer}} / M_{\text{polymer}}}{W_{\text{IO NP}} / M_{\text{IO NP}}} \right) \quad (2)$$

268 **Preparation of DMSA coated IO NPs.** We prepared DMSA coated IO NPs through a ligand  
 269 exchange process (Supplementary Ref. 4). Briefly, excess DMSA (20 mg) was dissolved in 10 mL  
 270 ultra-pure water in a three-neck flask. The as-prepared IO NPs (100  $\mu\text{mol}$ ) dispersed in hexane were  
 271 added to the flask. The solution was then heated to reflux for 2 h. After cooling to room temperature,  
 272 acetone was added to the lower layer and purified by centrifugation. The final products were  
 273 redispersed in water and stored at  $4 \text{ }^\circ\text{C}$  for further use.

274

275

276 **Supplementary Table 1** Summary of  $r_2$  values of single IO-5 and IO-15 NPs, and IO clusters C1-C5  
 277 measured on a 7 T MRI scanner. The effective radius for IO cubes and IO plates are about 20 and 28  
 278 nm when modeling them as spheres. Mean values  $\pm$  s.d.;  $n = 3$ .

| Samples          | Saturated magnetization (emu g <sup>-1</sup> ) | Diameter (nm)    | $r_2$ (mM <sup>-1</sup> s <sup>-1</sup> ) | $r_1$ (mM <sup>-1</sup> s <sup>-1</sup> ) | $r_2/r_1$ |
|------------------|------------------------------------------------|------------------|-------------------------------------------|-------------------------------------------|-----------|
| <b>IO-5</b>      | 43.18                                          | 5.2 $\pm$ 0.2    | 70.2 $\pm$ 5.7                            | 1.38 $\pm$ 0.3                            | 50.9      |
| <b>IO-15</b>     | 65.10                                          | 15.1 $\pm$ 0.3   | 127.4 $\pm$ 3.4                           | 1.17 $\pm$ 0.2                            | 108.9     |
| <b>IO C1</b>     | 40.28                                          | 115.5 $\pm$ 10.4 | 231.6 $\pm$ 9.3                           | 2.11 $\pm$ 0.2                            | 109.7     |
| <b>IO C2</b>     | 60.37                                          | 127.8 $\pm$ 13.4 | 358.3 $\pm$ 14.2                          | 0.8 $\pm$ 0.2                             | 447.9     |
| <b>IO C3</b>     | 53.69                                          | 129.2 $\pm$ 11.2 | 533.4 $\pm$ 13.2                          | 0.92 $\pm$ 0.1                            | 579.8     |
| <b>IO C4</b>     | 54.73                                          | 145.8 $\pm$ 23.5 | 515.3 $\pm$ 18.9                          | 1.56 $\pm$ 0.2                            | 330.3     |
| <b>IO C5</b>     | 50.22                                          | 238.9 $\pm$ 36.7 | 445.8 $\pm$ 24.6                          | 1.35 $\pm$ 0.3                            | 330.2     |
| <b>IO cubes</b>  | 61.31                                          | n/a              | 157.9 $\pm$ 6.9                           | 0.9 $\pm$ 0.1                             | 175.4     |
| <b>IO plates</b> | 57.60                                          | n/a              | 204.5 $\pm$ 11.4                          | 1.44 $\pm$ 0.2                            | 142.0     |
| <b>IO C6</b>     | 51.23                                          | 85.7 $\pm$ 13.9  | 589.3 $\pm$ 26.8                          | 2.24 $\pm$ 0.2                            | 263.1     |
| <b>IO C7</b>     | 51.38                                          | 91.6 $\pm$ 15.3  | 487.7 $\pm$ 21.5                          | 2.76 $\pm$ 0.5                            | 176.7     |

279

280

281 **Supplementary References**

282 1. Park, J. et al. Ultra-large-scale syntheses of monodisperse nanocrystals. *Nat. Mater.* **3**, 891-895  
283 (2004).

284 2. Zhou, Z. et al. Anisotropic shaped iron oxide nanostructures: controlled synthesis and proton  
285 relaxation shortening effects. *Chem. Mater.* **27**, 3505-3515 (2015).

286 3. Dong, H. et al. Recyclable antibacterial magnetic nanoparticles grafted with quaternized  
287 poly(2-(dimethylamino)ethyl methacrylate) brushes. *Biomacromolecules* **12**, 1305-1311 (2011).

288 4. Zhou, Z. et al. Engineered iron-oxide-based nanoparticles as enhanced T1 contrast agents for  
289 efficient tumor imaging. *ACS Nano* **7**, 3287-3296 (2013).

290

291
